1 **Burden and Determinants of Self-Reported High Blood Pressure Among Women of**  
2 **Reproductive Age In Tanzania: Evidence from 2022 Tanzania Demographic and Health**  
3 **Survey.**

4

5 **Authors and Affiliations:**

6 Nelson Musilanga,<sup>1\*</sup> Hussein Nasib,<sup>1</sup> Ambokile Mwakibolwa,<sup>1</sup> Given Jackson,<sup>1</sup> Frank  
7 Shayo,<sup>1</sup> Keneth Kijusya,<sup>1</sup> Samson Henry,<sup>1</sup> Clarkson Nhangwa,<sup>1</sup> Saleh Girukwigomba,<sup>1</sup> Joseph  
8 Keshi,<sup>1</sup> Mussa Luwumba.<sup>1</sup>

9 <sup>1</sup> Department of Internal Medicine, Maranatha Hospital, Mbeya, Tanzania.

10

11 Correspondence should be addressed to Nelson Musilanga; [nelson@maranathahospitals.co.tz](mailto:nelson@maranathahospitals.co.tz)

12

13 **Abstract**

14 **Background:** High blood pressure, commonly referred to as hypertension, remains a  
15 prevalent global health concern characterized by elevated arterial pressure. Its multifactorial  
16 etiology involves genetic predisposition, lifestyle factors, and comorbidities, posing  
17 significant risks such as cardiovascular diseases, stroke, and kidney diseases. Therefore, the  
18 aim of this study was to assess the burden and determinants of self-reported high blood  
19 pressure among women of reproductive age in Tanzania.

20

21 **Methods:** We utilized population-based cross-sectional data obtained from the Tanzania  
22 Demographic and Health Survey (TDHS) 2022, specifically phase VIII. The analysis  
23 involved a weighted sample of 15,254 women aged 15-49 years. The outcome variable was  
24 self-reported high blood pressure. Multivariable logistic regression models were employed to  
25 examine the independent variables associated with self-reported high blood pressure, and the

26 results were presented as adjusted odds ratios (aOR) with a 95% confidence interval (CI).

27 The significance level was set at  $p < 0.05$  for all analyses.

28

29 **Results:** Overall, the mean age of study participants was  $29.3 \pm 9.8$  years, with a self-  
30 reported high blood pressure burden of 6.6% among women of reproductive age in Tanzania.

31 Moreover, increased age correlated with higher odds of high blood pressure compared to

32 women aged 15-19 years. Those with a secondary level of education exhibited a higher

33 likelihood of high blood pressure (aOR: 1.76, 95% CI: 1.36-2.28,  $p < 0.001$ ) in contrast to

34 women with no education. Married (aOR: 1.57, 95% CI: 1.19-2.08,  $p=0.002$ ) and widowed

35 (aOR: 1.54, 95% CI: 1.11-2.12,  $p=0.009$ ) individuals were more prone to high blood pressure

36 than those who were never married. Additionally, women in higher wealth brackets showed a

37 significantly elevated risk of high blood pressure compared to those in the poorest wealth

38 group. Giving birth once or twice in the last 5 years reduced the odds by 20% (aOR: 0.80,

39 95% CI: 0.67-0.96,  $p < 0.001$ ). Conversely, self-reported poor health status and recent visits

40 to health facilities were associated with significantly higher odds of high blood pressure

41 (aOR: 2.87, 95% CI: 1.76-4.67,  $p < 0.001$ ) and (aOR: 1.38, 95% CI: 1.20-1.60,  $p < 0.001$ ),

42 respectively.

43

44 **Conclusion:** This study highlights the substantial burden of high blood pressure among

45 reproductive-age women, urging heightened awareness and proactive screening measures. It

46 unveils intricate factors contributing to elevated blood pressure, suggesting tailored strategies

47 involving lifestyle changes, education, and improved healthcare access. These findings

48 prompt targeted interventions, emphasizing the need for collaborative efforts among

49 stakeholders to effectively curb this health burden.

50

51 **Keywords:** Hypertension, Blood pressure, Noncommunicable diseases, Tanzania

52 **Background**

53

54 High blood pressure (BP) is an important modifiable risk factor contributing to heart failure,  
55 valvular heart diseases, atrial fibrillation, chronic kidney disease, coronary heart disease, and  
56 stroke [1]. High BP or hypertension is defined as a systolic BP greater or equal to 140 mmHg  
57 and/or diastolic BP greater or equal to 90 mmHg or a self-reported case under medication [2].  
58 By 2025, the global burden of high BP is projected to reach 1.56 billion; two-thirds of this  
59 burden is anticipated in low- and middle-income countries [3, 4]. In the sub-Saharan Africa  
60 region, non-communicable diseases (NCDs), including high BP, are projected to emerge as  
61 the leading causes of morbidity and mortality by 2030 [5, 6]. According to the World Health  
62 Organization (WHO) cardiovascular diseases (CVD) account for 17.9 million deaths  
63 annually, making them the most prevalent among NCDs [7].

64

65 The development of high BP is influenced by both modifiable and non-modifiable risk  
66 factors, such as increasing age, gender, genetic predisposition, unhealthy eating habits,  
67 physical inactivity, cigarette smoking, excessive alcohol consumption, and obesity [8–10].  
68 Furthermore, a preponderance of previous research has also reported that respondent's level  
69 of education [11, 12], place of residence [13, 14], occupation [15], lack of health insurance  
70 coverage [16], and presence of other comorbidities [14, 17], play pivotal roles in the  
71 development of high BP.

72

73 Despite several limitations, such as poor patient-clinician communication, self-diagnosis in  
74 the absence of an adequate explanation for symptoms, or issues related to health literacy, self-  
75 reported medical history data are frequently employed in epidemiological studies to evaluate  
76 the prevalence of medical conditions in the general population. Self-reporting of specific

77 medical conditions is a simple and cost-effective method that relies on individuals willingly  
78 disclosing their behaviors, beliefs, attitudes, or intentions regarding a particular condition.  
79 Therefore, due to its simplicity and low cost in obtaining health information from individuals,  
80 self-reporting has become an integral approach for continuous population monitoring,  
81 informing policies aimed at reducing the burden of various diseases [18, 19].

82

83 In light of the above, the current study aims to determine the burden and determinants of self-  
84 reported high blood pressure among women of reproductive age in Tanzania.

85

86

87

88

89

90

91

92

93

94

95

96

97

98

99

100

101

102

103

104

105

106

107

108

109

110

111

112

113

114

115

116

117

118

119

120

121

122

## 123 **Methods**

124

### 125 **Study design, Period and Setting.**

126 This was a population-based cross-sectional study design conducted in Tanzania located in  
127 the Eastern Africa from 24<sup>th</sup> February 2022 to 21<sup>st</sup> July 2022. Administratively, Tanzania is  
128 divided into 3 regions including the islands of Zanzibar. In turn, each administrative region is  
129 sub-divided into districts, each district into wards and each ward into villages (lowest  
130 administrative units of a country). Based on the 2022 population and housing census,  
131 Tanzania has a population of over 61.7 million people, of which 51.3% comprises females  
132 [20].

133

### 134 **Data Sources**

135

136 This secondary data analysis was based on the 2022 Tanzania Demographic and Health  
137 Surveys (TDHS). This is a nationally representative surveys conducted every four years by  
138 the National Bureau of Statistics (NBS) and Zanzibar Bureau of Statistics (ZBS) with  
139 financial and technical assistance by ICF International provisioned through the United States  
140 Agency for International Development (USAID)-funded Monitoring and Evaluation to  
141 Assess and Use Results (MEASURE) DHS program in collaboration with other donor  
142 agencies. The 2022 TDHS dataset is publicly available and can be accessed through the DHS  
143 program database at <http://dhsprogram.com/data/available-datasets.cfm>.

144

### 145 **Sampling procedure**

146 The 2022 TDHS sample involved a multi-stage stratified cluster sampling design based on a  
147 list of enumeration areas (EAs) delineated for the 2012 Tanzania Population and Housing

148 Census (2012 PHC). The EAs were selected with a probability proportional to their size  
149 within each sampling stratum. A total of 629 clusters were selected. Among the 629 EAs, 211  
150 were from urban areas and 418 were from rural areas. Then, 26 households were selected  
151 systematically from each cluster, for a total anticipated sample size of 16,354 households for  
152 the 2022 TDHS. The detailed sampling procedure has been reported previously [21].

153

#### 154 **Study population and sample size**

155 All women of reproductive age, 15 to 49 years, were included in this study. The individual  
156 questionnaire of the 2022 TDHS dataset was used to extract the study-specific outcome and  
157 explanatory variables from a nationally representative sample of 15,254 women, yielding a  
158 response rate of 97%.

159

#### 160 **Data Collection**

161 Data collection was carried out from February 24, 2022 to July 21, 2022 by 18 field teams, 3  
162 teams for Zanzibar and 15 teams for Tanzania Mainland. During fieldwork, enumeration area  
163 maps, listing forms, and local leaders assisted the trained field staff in identifying the sampled  
164 clusters and households. The team leaders and computer-assisted personal interviewing  
165 supervisors were responsible for data quality in the field.

166

#### 167 **Outcome variable**

168 The main outcome variable in this study was self-reported high blood pressure. Participants  
169 were asked if they had ever been told they have high blood pressure, eliciting a dichotomized  
170 response of 'Yes' or 'No.'

171

#### 172 **Independent Variable**

173 Demographic and socioeconomic variables, such as the respondent's age, place of residence,  
174 highest education level, wealth index status, marital status, number of children ever born,  
175 working status, coverage by health insurance, self-reported health status, visiting health  
176 facility in the last 12 months, and cigarette use, were included as independent variables. The  
177 respondent's age was grouped into 5-year age brackets. Place of residence was categorized as  
178 rural or urban. The highest level of education was separated into four categories: no  
179 education, primary level, secondary level, and higher education. The combined wealth index  
180 status was categorized into five groups: poorest, poorer, middle, richer, and richest. Marital  
181 status was also classified into six groups: never married, married, living with a partner,  
182 widowed, divorced, and separated. The total number of children ever born was categorized  
183 into 0-children, 1-5 children, and >5 children. Other variables such as the respondent's  
184 working status, coverage by health insurance, self-reported health status, visiting a health  
185 facility in the last 12 months, and cigarette smoking were dichotomized into 'Yes' or 'No'. Our  
186 choice of these independent variables was influenced by variables included in the DHS  
187 datasets and previous studies that found these variables to be important factors influencing  
188 high blood pressure [8–17].

189

## 190 **Statistical analysis**

191 Analysis was conducted using both descriptive and inferential statistical methods. The  
192 descriptive statistics are expressed as numbers with percentages in the form of tables while  
193 the inferential statistics adopted were bivariate and multivariate analysis. The bivariate  
194 analysis was performed using chi-square, and the multivariate analysis was performed using  
195 binary logistic regression. The logistic regression model was used to investigate the  
196 relationship between the independent variables and the outcome variable. The generated  
197 adjusted odds ratios (aOR) were estimated to assess the strength of the associations and used

198 the 95% confidence intervals (CIs) for significance testing. The level of significance was set  
199 at  $p < 0.05$  (2-tailed) for all the analyses. Sample weighting was applied to allow for  
200 adjustments for the cluster sampling design and sampling probabilities across clusters and  
201 strata. Statistical Product and Service Solutions (SPSS) for Macintosh version 25 (IBM Inc.,  
202 Chicago, Ill., USA) was used to run all analysis.

203

#### 204 **Ethical consideration**

205 This study was based on the analysis of population-based dataset available in the public  
206 domain with all identifiers removed. The objectives of this study was approved by  
207 MEASURE DHS/ICF International and permission was granted to access, download and use  
208 the dataset with authorization number 194069. During the surveys, the protocols and data  
209 collection procedures were approved by relevant authorities in Tanzania mainland and  
210 Zanzibar. In the data collection procedures, all participants were asked to provide verbal  
211 informed consent after the consent statement was read to them which emphasized the  
212 voluntary nature of the survey. Interviews were conducted under the private conditions  
213 afforded by the environments encountered. Confidentiality was adhered to by making sure  
214 that names of respondents were not written in the data collection tools and hence were  
215 anonymous.

216

217

218

219

220

221

222

223

224

225



226

227

228

229

230

231 **Results**

232

233 **Sociodemographic characteristics of the study participants**

234 As shown in table 1, a total of 15,254 women of reproductive age from all regions of

235 Tanzania were included in the study. The mean age of study participants was  $29.3 \pm 9.8$ ,

236 ranging from 15 to 49 years old. Participants exhibited a range of educational backgrounds,

237 with 48.6% predominantly holding a primary education level, while 1.4% possessed higher

238 education qualifications. A majority were married (44.3%), and nearly two-thirds of

239 participants (64.3%) were living in rural areas. Furthermore, participants represented diverse

240 economic profiles, with the poorest accounting for 14.9% and the richest comprising 26.5%.

241

242 Regarding health and lifestyle factors, a significant portion of participants (94.3%) were not

243 covered by health insurance, 99.5% had not smoked cigarettes, and approximately 53.8%

244 reported visiting a health facility in the past 12 months. Additionally, 52.7% reported having

245 a good health status.

246

247 **Burden and determinants of self-reported high blood pressure**

248 Overall, 1,014 (6.6%) of the study participants self-reported having high blood pressure, as

249 indicated in table 2. Comparatively, individuals with high blood pressure exhibited a higher

250 proportion among those aged  $\geq 40$  years (40.5% vs. 18.1%,  $p < 0.001$ ) than participants

251 without high blood pressure. The group with high blood pressure also showed a higher

252 representation of individuals in the richer and richest wealth status categories (70.6% vs.

253 47.1%,  $p < 0.001$ ). Additionally, a significantly proportion of women who had given birth to

254 more than three children were observed in the high blood pressure group (45.3% vs. 30.6%, p  
255 < 0.01). However, percentages of cigarette smoking and having given birth more than twice  
256 in the past 5 years were comparable between the groups (0.5% vs. 0.4% and 2.0% vs. 2.4%,  
257 respectively).

258 Furthermore, the multivariate logistic regression model was fitted with baseline covariates  
259 associated with self-reported high blood pressure determined through bivariate analysis at a  
260 significance level of  $p < 0.05$ , as indicated in table 2. Several factors were independently  
261 associated with self-reported high blood pressure among women of reproductive age in  
262 Tanzania. These factors include age-groups: 20-24 (aOR: 2.45, 95% CI: 1.64-3.65,  $p <$   
263 0.001), 25-29 (aOR: 3.77, 95% CI: 2.48-5.71,  $p < 0.001$ ), 30-34 (aOR: 4.60, 95% CI: 2.99-  
264 7.07,  $p < 0.001$ ), 35-39 (aOR: 6.26, 95% CI: 4.04-9.70,  $p < 0.001$ ), 40-44 (aOR: 7.62, 95%  
265 CI: 4.86-11.95,  $p < 0.001$ ), and 45-49 (aOR: 11.78, 95% CI: 7.45-18.62,  $p < 0.001$ );  
266 secondary level of education (aOR: 1.76, 95% CI: 1.36-2.28,  $p < 0.001$ ); marital status-  
267 married (aOR: 1.57, 95% CI: 1.19-2.08,  $p=0.002$ ) and widowed (aOR: 1.54, 95% CI: 1.11-  
268 2.12,  $p=0.009$ ); middle wealth status (aOR: 2.28, 95% CI: 1.64-3.16,  $p < 0.001$ ); richer  
269 wealth status (aOR: 2.98, 95% CI: 2.14-4.15,  $p < 0.001$ ); richest wealth status (aOR: 5.06,  
270 95% CI: 3.58-7.15,  $p < 0.001$ ); having a self-reported bad health status (aOR: 2.87, 95% CI:  
271 1.76-4.67,  $p < 0.001$ ); visiting a health facility in the past 12 months (aOR: 1.38, 95% CI:  
272 1.20-1.60,  $p < 0.001$ ); and giving birth once or twice in the last 5 years (aOR: 0.80, 95% CI:  
273 0.67-0.96,  $p < 0.001$ ).

274  
275  
276  
277  
278  
279  
280  
281  
282  
283

284  
285  
286  
287  
288  
289  
290  
291  
292  
293  
294

## **Discussion**

295 High blood pressure, commonly referred to as hypertension, is increasingly imposing a  
296 significant disease burden, particularly in low and middle-income countries (LMICs) like  
297 Tanzania. Therefore, this study aimed to determine the prevalence and determinants of self-  
298 reported high blood pressure among women of reproductive age in Tanzania, utilizing the  
299 most recent nationally representative data. The study found a 6.6% prevalence of high blood  
300 pressure among women of reproductive age. Several factors independently correlated with  
301 self-reported high blood pressure, including older age-groups, secondary education level,  
302 marital status (being married or widowed), middle, richer, and richest wealth statuses, self-  
303 reported poor health status, recent health facility visits, and having given birth once or twice  
304 in the last 5 years.

305

306 Our findings are consistent with a prior report from a community-based survey in rural  
307 Mwanza [22], which recorded a relatively similar prevalence rate of 8%. However, our  
308 findings were notably lower compared to several other community-based studies across the  
309 country. For instance, studies in Northern Tanzania reported a prevalence of 28.0% [23],  
310 while another in rural Morogoro noted 29.3% [24], and the national representative STEPS  
311 survey in 2012 found a prevalence of 25.9% [25]. The lower prevalence in our study might be  
312 due to the inclusion of younger participants, as 38.9% were aged 15–24 years, contrasting  
313 previous studies that involved older participants, where high blood pressure is more common.

314 Additionally, it is important to note that many individuals with hypertension in our study  
315 might not be aware of their condition [24].

316

317 When we compare our findings with reports from other countries, we uncover a wide range  
318 of outcomes. A cross-sectional survey conducted in Nakaseke health district in Uganda  
319 reported a quite similar prevalence rate of self-reported high blood pressure at 6.3% [26].  
320 Population-based studies among women in Kenya and Benin reported prevalence rates of  
321 9.38% and 9.9%, respectively [27, 28]. Additionally, other studies indicated higher  
322 prevalence rates of high blood pressure than those observed in our study. For instance, a  
323 study in Northern China reported a prevalence of 19.0% [29], South Africa reported a  
324 prevalence of 23.6% [19], while Brazil showed 24.1% [11], and the overall age-standardized  
325 rate among women in the United States reached 27.0% [30]. These differences underscore  
326 significant disparities in the prevalence of self-reported high blood pressure among diverse  
327 populations, potentially influenced by factors such as methodological differences, population  
328 healthcare-seeking behavior, socioeconomic status, sociocultural norms, and awareness  
329 within a population regarding specific health conditions.

330

331 In this study, the likelihood of self-reported high blood pressure increased with age, ranging  
332 from 14.4% among individuals aged 25–29 to 23.3% among those aged 44–49 years, aligning  
333 with previous reports [31, 32]. Age-related elevation in high blood pressure has been  
334 associated with arterial stiffness and reduced vessel elasticity due to arteriosclerotic structural  
335 changes and calcification [33]. Women with secondary level of educations were more likely  
336 to report high blood pressure compared to those with no education. However, those with  
337 higher education were less likely to have high blood pressure 2.4%. Individuals with higher

338 levels of education often exhibit a greater awareness of health-related behaviors, including  
339 regular exercise, balanced diets, and stress management [34, 35].

340

341 The loss of a spouse through widowhood can have adverse effects on a woman's health,  
342 including an increased risk of high blood pressure as observed in our study. The emotional  
343 stress, social isolation, and potential lifestyle changes following the loss of a partner can  
344 contribute to higher blood pressure levels [36, 37]. Conversely, the association between being  
345 married and self-reported high blood pressure in our setting may be influenced by a  
346 significant number of participants, the majority of whom were married (44.3%).

347

348 Furthermore, richest wealth status had a 5-fold increased risk of high blood pressure among  
349 women. This is contrast with reports from previous studies [38, 39]. However, increased  
350 wealth might afford access to certain lifestyle choices that can negatively impact blood  
351 pressure, such as excessive alcohol consumption, high-calorie diets, or a lack of emphasis on  
352 regular exercise [40, 41].

353

354 A self-reported bad health status was linked to more than twice the increased risk of high  
355 blood pressure compared to individuals reporting very good health status. Poor health status  
356 leads to physiological changes impacting the cardiovascular system, heightening the risk of  
357 high blood pressure. Additionally, women who had visited a health facility in the past 12  
358 months were more likely to report high blood pressure than those who had not. This may be  
359 attributed to the incomplete functioning of community-level screening, consequently  
360 resulting in a higher detection rate at the health facility level. These findings highlight the  
361 need for healthcare providers to implement community-level screening for high blood  
362 pressure.

363

364 Moreover, the decreased likelihood of high blood pressure among women who have given  
365 birth once or twice in the past 5 years aligns with the recommendation to wait at least 18 to  
366 24 months after a live birth before attempting another pregnancy [42]. Multiple pregnancies  
367 with inadequate spacing may heighten the risk of gestational hypertension or preeclampsia  
368 due to physiological changes during pregnancy, including elevated blood volume and  
369 hormonal fluctuations. These factors can potentially predispose women to chronic high blood  
370 pressure later in life.

371

### 372 **Strength and Limitation**

373 Our study has a few limitations. Firstly, the cross-sectional design restricts our ability to  
374 establish cause-and-effect relationships among the identified variables. Therefore, these  
375 findings should be interpreted cautiously. Additionally, reliance on self-reported high blood  
376 pressure might introduce recall bias, potentially leading to some degree of misreporting or  
377 overreporting of high blood pressure prevalence among women of reproductive age.  
378 However, the study's key strengths include its large sample size and national  
379 representativeness, suggesting that the sampled population may genuinely represent the  
380 Tanzanian population.

381

### 382 **Conclusion and Implication**

383 The culmination of this study underscores several significant insights, shaping our  
384 understanding and potentially guiding interventions in this demographic. Firstly, the  
385 prevalence rates observed in this study reflect an alarming trend, highlighting the substantial  
386 burden of high blood pressure among women of reproductive age. The figures underscore the  
387 imperative need for heightened awareness, proactive screening measures, and targeted

388 interventions aimed at mitigating the risks associated with high blood pressure among  
389 women.

390

391 Moreover, the determinants identified within this research elucidate the complex interplay of  
392 various factors contributing to elevated blood pressure levels. Understanding these  
393 determinants provides a framework for developing tailored strategies encompassing lifestyle  
394 modifications, education initiatives, and improved healthcare accessibility.

395

396 Importantly, the implications drawn from this study reverberate across public health policies,  
397 clinical practice, and community-based interventions. Implementing targeted screening  
398 programs, fostering health-promoting behaviors, and enhancing healthcare access are pivotal  
399 in mitigating the burden of high blood pressure in this demographic. Additionally, an  
400 interdisciplinary approach encompassing healthcare providers, public health officials,  
401 policymakers, and community stakeholders is imperative to effectuate sustainable and  
402 impactful changes

403

404

405

406

407

408

409

410

411

412

413

414

415

416

417

418

419

420

421

422

423  
424  
425  
426  
427  
428  
429  
430  
431  
432  
433  
434  
435  
436  
437  
438

439 **Abbreviation**

440  
441  
442  
443  
444  
445  
446  
447

aOR: Adjusted odds ratios; BP: Blood pressure; CI: Confidence intervals; CVD: Cardiovascular diseases; EAs: Enumeration areas; LMICs: Low and middle-income countries; MEASURE: Monitoring and Evaluation to Assess and Use Results; NCD: Non-communicable diseases; NBS: National Bureau of Statistics; PHC: Population and Housing Census; SPSS: Statistical Product and Service Solutions; TDHS: Tanzania Demographic and Health Surveys; USAID: United States Agency for International Development (USAID); WHO: World Health Organization; ZBS: Zanzibar Bureau of Statistics.

448  
449

450 **Declarations**

451  
452

**Ethical Approval and Consent to participate**

453  
454  
455  
456  
457  
458

The protocols and data collection procedures received approval from relevant authorities in both Tanzania mainland and Zanzibar, including the National Institute of Medical Research (NIMR), Zanzibar Medical Research Ethical Committee (ZAMREC), the Institutional Review Board of ICF International, and the Centers for Disease Control and Prevention in Atlanta. All participants were asked to provide verbal informed consent after the consent statement was read to them, emphasizing the voluntary nature of the survey. Interviews were



459 conducted under the private conditions afforded by the environments encountered.  
460 Confidentiality was ensured by making sure that names of respondents were not written in the  
461 data collection tools, and hence, the responses remained anonymous. The approval to use the  
462 data in this study was obtained from MEASURE DHS with authorization number 194069.

463

#### 464 **Consent for publication**

465 Not Applicable.

466

#### 467 **Availability of data and materials**

468 The dataset generated and/or analyzed during the present study is available in the DHS  
469 Program archive repository [<https://dhsprogram.com/data/available-datasets.cfm>].

470

#### 471 **Competing Interest**

472 The authors declare that they have no competing interests.

473

#### 474 **Funding**

475 This study did not receive funding from any public, commercial, or not-for-profit funding  
476 agency.

477

#### 478 **Author's contribution**

479 NM, HN, GJ, FS, and CN contributed to the conception and design of the study, acquisition  
480 of data, data analysis and interpretation, and drafting and revising of the manuscript. SG, AM,  
481 SH, KK, JK, ML, and EM critically revised the manuscript for its intellectual content. All  
482 authors have read and approved the final draft of the manuscript.

483

484 **Acknowledgement**

485 We are grateful to the Monitoring and Evaluation to Assess and Use Results-Demographic  
486 and Health Surveys (MEASURE DHS) and the National Bureau of Statistics (NBS) for  
487 providing free access to the original dataset.

488  
489

490  
491  
492  
493  
494

495 **Reference**

- 496 1. Fuchs FD, Whelton PK. High Blood Pressure and Cardiovascular Disease. *Hypertension*.  
497 2020;75:285–92.
- 498 2. Chobanian A V, Bakris GL, Black HR, Cushman WC, Green LA, Izzo JLJ, et al. The  
499 Seventh Report of the Joint National Committee on Prevention, Detection, Evaluation, and  
500 Treatment of High Blood Pressure: the JNC 7 report. *JAMA*. 2003;289:2560–72.
- 501 3. Mills KT, Bundy JD, Kelly TN, Reed JE, Kearney PM, Reynolds K, et al. Global  
502 Disparities of Hypertension Prevalence and Control: A Systematic Analysis of Population-  
503 Based Studies From 90 Countries. *Circulation*. 2016;134:441–50.
- 504 4. Dhungana RR, Pandey AR, Shrestha N. Trends in the Prevalence, Awareness, Treatment,  
505 and Control of Hypertension in Nepal between 2000 and 2025: A Systematic Review and  
506 Meta-Analysis. *Int J Hypertens*. 2021;2021:6610649. doi:10.1155/2021/6610649.
- 507 5. Gouda HN, Charlson F, Sorsdahl K, Ahmadzada S, Ferrari AJ, Erskine H, et al. Burden of  
508 non-communicable diseases in sub-Saharan Africa, 1990-2017: results from the Global  
509 Burden of Disease Study 2017. *Lancet Glob Heal*. 2019;7:e1375–87.
- 510 6. Yuyun MF, Sliwa K, Kengne AP, Mocumbi AO, Bukhman G. Cardiovascular Diseases in  
511 Sub-Saharan Africa Compared to High-Income Countries: An Epidemiological Perspective.

- 512 Glob Heart. 2020;15:15.
- 513 7. World Health Organization. Noncommunicable diseases. [https://www.who.int/news-](https://www.who.int/news-room/fact-sheets/detail/noncommunicable-diseases)  
514 [room/fact-sheets/detail/noncommunicable-diseases](https://www.who.int/news-room/fact-sheets/detail/noncommunicable-diseases). Accessed 16 Nov 2023.
- 515 8. Yusuf S, Joseph P, Rangarajan S, Islam S, Mente A, Hystad P, et al. Modifiable risk  
516 factors, cardiovascular disease, and mortality in 155□722 individuals from 21 high-income,  
517 middle-income, and low-income countries (PURE): a prospective cohort study. *Lancet*  
518 (London, England). 2020;395:795–808.
- 519 9. Gbadamosi MA, Tlou B. Modifiable risk factors associated with non-communicable  
520 diseases among adult outpatients in Manzini, Swaziland: a cross-sectional study. *BMC Public*  
521 *Health*. 2020;20:665. doi:10.1186/s12889-020-08816-0.
- 522 10. Brandão MP, Sa-Couto P, Gomes G, Beça P, Reis J. Factors Associated with  
523 Cardiovascular Disease Risk among Employees at a Portuguese Higher Education  
524 Institution. *Int J Environ Res Public Health*. 2022;19.
- 525 11. Malta DC, Bernal RTI, Andrade SSC de A, Silva MMA da, Velasquez-Melendez G.  
526 Prevalence of and factors associated with self-reported high blood pressure in Brazilian  
527 adults. *Rev Saude Publica*. 2017;51 suppl 1:11s.
- 528 12. Sun K, Lin D, Li M, Mu Y, Zhao J, Liu C, et al. Association of education levels with the  
529 risk of hypertension and hypertension control: a nationwide cohort study in Chinese adults. *J*  
530 *Epidemiol Community Health*. 2022;76:451 LP – 457. doi:10.1136/jech-2021-217006.
- 531 13. Sharma JR, Mabhida SE, Myers B, Apalata T, Nicol E, Benjeddou M, et al. Prevalence of  
532 Hypertension and Its Associated Risk Factors in a Rural Black Population of Mthatha Town,  
533 South Africa. *Int J Environ Res Public Health*. 2021;18.
- 534 14. Kandala N-B, Nnanatu CC, Dukhi N, Sewpaul R, Davids A, Reddy SP. Mapping the  
535 Burden of Hypertension in South Africa: A Comparative Analysis of the National 2012  
536 SANHANES and the 2016 Demographic and Health Survey. *Int J Environ Res Public Health*.

537 2021;18.

538 15. Joshi S, Thapa BB. Socioeconomic risk factors of hypertension and blood pressure among  
539 persons aged 15-49 in Nepal: a cross-sectional study. *BMJ Open*. 2022;12:e057383.

540 16. Jones HJ, Ibemere S, Gaillard T, Harris A, Anthony J, Shambley-Ebron D. Factors  
541 Associated with Self-Reported Hypertension Among Black Women. *J Natl Black Nurses  
542 Assoc*. 2020;31:32–8.

543 17. Ab Majid NL, Rodzlan Hasani WS, Mat Rifin H, Robert Lourdes TG, Jane Ling MY,  
544 Saminanthan TA, et al. Self-reported diabetes, hypertension and hypercholesterolemia among  
545 older persons in Malaysia. *Geriatr Gerontol Int*. 2020;20 Suppl 2:79–84.

546 18. Pihlajamäki M, Uitti J, Arola H, Ollikainen J, Korhonen M, Nummi T, et al. Self-reported  
547 health problems and obesity predict sickness absence during a 12-month follow-up: a  
548 prospective cohort study in 21 608 employees from different industries. *BMJ Open*.  
549 2019;9:e025967. doi:10.1136/bmjopen-2018-025967.

550 19. Ntenda PAM, El-Meidany WMR, Tiruneh FN, Motsa MPS, Nyirongo J, Chirwa GC, et  
551 al. Determinants of self-reported hypertension among women in South Africa: evidence from  
552 the population-based survey. *Clin Hypertens*. 2022;28:39.

553 20. Tanzania National Bureau Of Statistics. 2022 Population and Housing Census. 2022.  
554 <https://sensa.nbs.go.tz/>. Accessed 17 Nov 2023.

555 21. Ministry of Health (MoH) [Tanzania Mainland], Ministry of Health (MoH) [Zanzibar],  
556 National Bureau of Statistics (NBS), Office of the Chief Government Statistician (OCGS)  
557 2022. Tanzania Demographic and Health Survey and Malaria Indicator Survey 2022 Final  
558 Report. Dodoma, Tanzania, Rockville, Maryland, USA MoH, NBS, OCGS, ICF. 2022.

559 22. Mosha NR, Mahande M, Juma A, Mboya I, Peck R, Urassa M, et al.  
560 Prevalence, awareness and factors associated with hypertension in North West Tanzania.  
561 *Glob Health Action*. 2017;10:1321279.

- 562 23. Galson SW, Staton CA, Karia F, Kilonzo K, Lunyera J, Patel UD, et al. Epidemiology of  
563 hypertension in Northern Tanzania: a community-based mixed-methods study. *BMJ Open*.  
564 2017;7:e018829.
- 565 24. Muhihi AJ, Anaeli A, Mpembeni RNM, Sunguya BF, Leyna G, Kakoko D, et al.  
566 Prevalence, Awareness, Treatment, and Control of Hypertension among Young and Middle-  
567 Aged Adults: Results from a Community-Based Survey in Rural Tanzania. *Int J Hypertens*.  
568 2020;2020:9032476.
- 569 25. Mary M, Kagaruki G. Tanzania Steps Survey Report: Ministry of Health and Social  
570 Welfare and National Institute for Medical Research. 2013.
- 571 26. Siddharthan T, Kalyesubula R, Morgan B, Ermer T, Rabin TL, Kayongo A, et al. The  
572 rural Uganda non-communicable disease (RUNCD) study: prevalence and risk factors of  
573 self-reported NCDs from a cross sectional survey. *BMC Public Health*. 2021;21:2036.
- 574 27. Ekholuenetale M, Barrow A. Prevalence and determinants of self-reported high blood  
575 pressure among women of reproductive age in Benin: a population-based study. *Clin*  
576 *Hypertens*. 2020;26:12.
- 577 28. Chowdhury MAB, Epnere K, Haque MA, Mkuu RS. Urban rural differences in  
578 prevalence and risk factors of self-reported hypertension among Kenyan women: a  
579 population-based study. *J Hum Hypertens*. 2021;35:912–20.
- 580 29. Du M, Yin S, Wang P, Wang X, Wu J, Xue M, et al. Self-reported hypertension in  
581 Northern China: a cross-sectional study of a risk prediction model and age trends. *BMC*  
582 *Health Serv Res*. 2018;18:475.
- 583 30. Samanic CM, Barbour KE, Liu Y, Fang J, Lu H, Schieb L, et al. Prevalence of Self-  
584 Reported Hypertension and Antihypertensive Medication Use Among Adults - United States,  
585 2017. *MMWR Morb Mortal Wkly Rep*. 2020;69:393–8.
- 586 31. Nahimana M-R, Nyandwi A, Muhimpundu MA, Olu O, Condo JU, Rusanganwa A, et al.

- 587 A population-based national estimate of the prevalence and risk factors associated with  
588 hypertension in Rwanda: implications for prevention and control. *BMC Public Health*.  
589 2017;18:2.
- 590 32. Mohamed SF, Mutua MK, Wamai R, Wekesah F, Haregu T, Juma P, et al. Prevalence,  
591 awareness, treatment and control of hypertension and their determinants: results from a  
592 national survey in Kenya. *BMC Public Health*. 2018;18 Suppl 3:1219.
- 593 33. Sun Z. Aging, Arterial Stiffness, and Hypertension. *Hypertension*. 2015;65:252–6.  
594 doi:10.1161/HYPERTENSIONAHA.114.03617.
- 595 34. Raghupathi V, Raghupathi W. The influence of education on health: an empirical  
596 assessment of OECD countries for the period 1995–2015. *Arch Public Heal*. 2020;78:20.  
597 doi:10.1186/s13690-020-00402-5.
- 598 35. Mohammadi F, Samouei R. Social determinants of health: Awareness and attitude of  
599 students and professors in medical sciences universities. *J Educ Health Promot*. 2023;12:155.
- 600 36. Liu M-Y, Li N, Li WA, Khan H. Association between psychosocial stress and  
601 hypertension: a systematic review and meta-analysis. *Neurol Res*. 2017;39:573–80.
- 602 37. Gordon AM, Mendes WB. A large-scale study of stress, emotions, and blood pressure in  
603 daily life using a digital platform. *Proc Natl Acad Sci*. 2021;118:e2105573118.  
604 doi:10.1073/pnas.2105573118.
- 605 38. Neufcourt L, Zins M, Berkman LF, Grimaud O. Socioeconomic disparities and risk of  
606 hypertension among older Americans: the Health and Retirement Study. *J Hypertens*.  
607 2021;39:2497–505.
- 608 39. Qin Z, Li C, Qi S, Zhou H, Wu J, Wang W, et al. Association of socioeconomic status  
609 with hypertension prevalence and control in Nanjing: a cross-sectional study. *BMC Public*  
610 *Health*. 2022;22:423. doi:10.1186/s12889-022-12799-5.
- 611 40. Mielke GI, Brown WJ, Nunes BP, Silva ICM, Hallal PC. Socioeconomic Correlates of

612 Sedentary Behavior in Adolescents: Systematic Review and Meta-Analysis. *Sports Med.*  
613 2017;47:61–75.

614 41. Gong W-J, Fong DY-T, Wang M-P, Lam T-H, Chung TW-H, Ho S-Y. Increasing  
615 socioeconomic disparities in sedentary behaviors in Chinese children. *BMC Public Health.*  
616 2019;19:754. doi:10.1186/s12889-019-7092-7.

617 42. Bauserman M, Nowak K, Nolen TL, Patterson J, Lokangaka A, Tshefu A, et al. The  
618 relationship between birth intervals and adverse maternal and neonatal outcomes in six low  
619 and lower-middle income countries. *Reprod Health.* 2020;17:157. doi:10.1186/s12978-020-  
620 01008-4.

621

622

623

624

625

626

627

628

629

630

631

632

633

634

635

636

637

638

639

640

641

642

643



**Table 1: Sociodemographic characteristics of the study participants (N=15254)**

| Variables              | Categories         | Total N=15254 | Self-Reported High BP |              |
|------------------------|--------------------|---------------|-----------------------|--------------|
|                        |                    |               | Yes (n=1014)          | No (n=14240) |
| <b>Age (Years)</b>     | 15-19              | 3142 (20.6%)  | 41 (4.0%)             | 3101 (21.8%) |
|                        | 20-24              | 2710 (17.8%)  | 94 (9.3%)             | 2616 (18.4%) |
|                        | 25-29              | 2500 (16.4%)  | 146 (14.4%)           | 2354 (16.5%) |
|                        | 30-34              | 2041 (13.4%)  | 148 (14.6%)           | 1893 (13.3%) |
|                        | 35-39              | 1882 (12.3%)  | 175 (17.3%)           | 1707 (12.0%) |
|                        | 40-44              | 1550 (10.2%)  | 174 (17.2%)           | 1376 (9.7%)  |
|                        | 45-49              | 1429 (9.4%)   | 236 (23.3%)           | 1193 (8.4%)  |
| <b>Education level</b> | No education       | 2387 (15.6%)  | 106 (10.5%)           | 2281 (16.0%) |
|                        | Primary            | 7413 (48.6%)  | 475 (46.8%)           | 6938 (48.7%) |
|                        | Secondary          | 5235 (34.3%)  | 409 (40.3%)           | 4826 (33.9%) |
|                        | Higher             | 219 (1.4%)    | 24 (2.4%)             | 195 (1.4%)   |
| <b>Marital status</b>  | Never married      | 4232 (27.7%)  | 121 (11.9%)           | 4111 (28.9%) |
|                        | Married            | 6751 (44.3%)  | 624 (61.5%)           | 6127 (43.0%) |
|                        | Cohabiting         | 2400 (15.7%)  | 100 (9.9%)            | 2300 (16.2%) |
|                        | Divorced/Separated | 1514 (9.9%)   | 132 (13.0%)           | 1382 (9.7%)  |
|                        | Widowed            | 357 (2.3%)    | 37 (3.6%)             | 320 (2.2%)   |
| <b>Residence</b>       | Urban              | 5441 (35.7%)  | 502 (49.5%)           | 4939 (34.7%) |
|                        | Rural              | 9813 (64.3%)  | 512 (50.5%)           | 9301 (65.3%) |

**Zone**

|                      |              |             |              |
|----------------------|--------------|-------------|--------------|
| Western              | 1127 (7.4%)  | 39 (3.8%)   | 1088 (7.6%)  |
| Northern             | 1461 (9.6%)  | 103 (10.3%) | 1358 (9.5%)  |
| Central              | 1328 (8.7%)  | 37 (3.6%)   | 1291 (9.1%)  |
| Southern Highlands   | 1209 (7.9%)  | 74 (7.3%)   | 1135 (8.0%)  |
| Southern             | 794 (5.2%)   | 22 (2.2%)   | 772 (5.4%)   |
| South West Highlands | 1767 (11.6%) | 51 (5.0%)   | 1716 (12.1%) |
| Lake                 | 3148 (20.6%) | 112 (11.0%) | 3036 (21.3%) |
| Eastern              | 1852 (12.1%) | 205 (20.2%) | 1647(11.6%)  |
| Zanzibar             | 2568 (16.8%) | 371 (36.6%) | 2197 (15.4%) |

**Wealth status**

|         |              |             |              |
|---------|--------------|-------------|--------------|
| Poorest | 2271 (14.9%) | 51 (5.0%)   | 2220 (15.6%) |
| Poorer  | 2498 (16.4%) | 77 (7.6%)   | 2421 (17.0%) |
| Middle  | 3063 (20.1%) | 170 (16.8%) | 2893 (20.3%) |
| Richer  | 3378 (22.1%) | 241 (23.8%) | 3137 (22.0%) |
| Richest | 4044 (26.5%) | 475 (46.8%) | 3569 (25.1%) |

**Smoke cigarette**

|     |               |              |               |
|-----|---------------|--------------|---------------|
| Yes | 69 (0.5%)     | 5 (0.5%)     | 64 (0.4%)     |
| No  | 15185 (99.5%) | 1009 (99.5%) | 14176 (99.6%) |

**Currently working**

|     |              |             |              |
|-----|--------------|-------------|--------------|
| Yes | 8923 (58.5%) | 679 (67.0%) | 8244 (57.9%) |
| No  | 6331 (41.5%) | 335 (33.0%) | 5996 (42.1%) |

**Covered by health insurance**

|     |               |             |               |
|-----|---------------|-------------|---------------|
| Yes | 868 (5.7%)    | 98 (9.7%)   | 770 (5.4%)    |
| No  | 14386 (94.3%) | 916 (90.3%) | 13470 (94.6%) |

**Self-Reported Health Status**

|           |              |             |              |
|-----------|--------------|-------------|--------------|
| Very good | 3105 (20.4%) | 214 (21.1%) | 2891 (20.3%) |
|-----------|--------------|-------------|--------------|

|                                         |                      |              |             |              |
|-----------------------------------------|----------------------|--------------|-------------|--------------|
|                                         | Good                 | 8042 (52.7%) | 496 (48.9%) | 7546 (53.0%) |
|                                         | Moderate             | 3956 (25.9%) | 278 (27.4%) | 3678 (25.8%) |
|                                         | Bad                  | 147 (1.0%)   | 25 (2.5%)   | 122 (0.9%)   |
|                                         | Very bad             | 4 (0.03%)    | 1 (0.1%)    | 3 (0.02%)    |
| <b>Visited HF in the Last 12 months</b> | Yes                  | 8207 (53.8%) | 661 (65.2%) | 7546 (53.0%) |
|                                         | No                   | 7047 (46.2%) | 353 (34.8%) | 6694 (47.0%) |
| <b>Total Children Ever Born</b>         | No Child             | 4138 (27.1%) | 121 (11.9%) | 4017 (28.2%) |
|                                         | 1 to 3 Children      | 6300 (41.3%) | 434 (42.8%) | 5866 (41.2%) |
|                                         | More than 3 Children | 4816 (31.6%) | 459 (45.3%) | 4357 (30.6%) |
| <b>Birth in Last 5 Years</b>            | No Birth             | 7573 (49.6%) | 554 (54.6%) | 7019 (49.3%) |
|                                         | Once or Twice        | 7324 (48.0%) | 440 (43.4%) | 6884 (48.3%) |
|                                         | More than Twice      | 357 (2.3%)   | 20 (2.0%)   | 337 (2.4%)   |

Table 2: Bivariate and multivariate analysis for factors associated with self-reported high blood pressure

| Variables              | Categories         | Self-Reported High BP |              | Crude               |           | Adjusted           |                     |
|------------------------|--------------------|-----------------------|--------------|---------------------|-----------|--------------------|---------------------|
|                        |                    | Yes n (%)             | No n (%)     | OR (95% CI)         | P-value   | OR (95% CI)        | P-value             |
| <b>Age (Years)</b>     | 15-19              | 41 (4.0%)             | 3101 (21.8%) | 1 (Reference)       |           | 1 (Reference)      |                     |
|                        | 20-24              | 94 (9.3%)             | 2616 (18.4%) | 2.72 (1.88-3.94)    | p < 0.001 | 2.45 (1.64-3.65)   | <b>p &lt; 0.001</b> |
|                        | 25-29              | 146 (14.4%)           | 2354 (16.5%) | 4.69 (3.30-6.66)    | p < 0.001 | 3.77 (2.48-5.71)   | <b>p &lt; 0.001</b> |
|                        | 30-34              | 148 (14.6%)           | 1893 (13.3%) | 5.91 (4.17-8.40)    | p < 0.001 | 4.60 (2.99-7.07)   | <b>p &lt; 0.001</b> |
|                        | 35-39              | 175 (17.3%)           | 1707 (12.0%) | 7.75 (5.49-10.95)   | p < 0.001 | 6.26 (4.04-9.70)   | <b>p &lt; 0.001</b> |
|                        | 40-44              | 174 (17.2%)           | 1376 (9.7%)  | 9.56 (6.77-13.52)   | p < 0.001 | 7.62 (4.86-11.95)  | <b>p &lt; 0.001</b> |
|                        | 45-49              | 236 (23.3%)           | 1193 (8.4%)  | 14.96 (10.67-20.99) | p < 0.001 | 11.78 (7.45-18.62) | <b>p &lt; 0.001</b> |
| <b>Education level</b> | No education       | 106 (10.5%)           | 2281 (16.0%) | 1 (Reference)       |           | 1 (Reference)      |                     |
|                        | Primary            | 475 (46.8%)           | 6938 (48.7%) | 1.47 (1.19-1.83)    | p < 0.001 | 1.17 (0.93-1.48)   | p=0.175             |
|                        | Secondary          | 409 (40.3%)           | 4826 (33.9%) | 1.82 (1.47-2.27)    | p < 0.001 | 1.76 (1.36-2.28)   | <b>p &lt; 0.001</b> |
|                        | Higher             | 24 (2.4%)             | 195 (1.4%)   | 2.65 (1.66-4.22)    | p < 0.001 | 1.47 (0.87-2.47)   | p=0.147             |
| <b>Marital status</b>  | Never married      | 121 (11.9%)           | 4111 (28.9%) | 1 (Reference)       |           | 1 (Reference)      |                     |
|                        | Married            | 624 (61.5%)           | 6127 (43.0%) | 3.46 (2.84-4.22)    | p < 0.001 | 1.57 (1.19-2.08)   | <b>p=0.002</b>      |
|                        | Cohabiting         | 100 (9.9%)            | 2300 (16.2%) | 1.48 (1.13-1.94)    | p=0.005   | 0.99 (0.71-1.38)   | p=0.933             |
|                        | Divorced/Separated | 132 (13.0%)           | 1382 (9.7%)  | 3.93 (2.67-5.78)    | p < 0.001 | 1.40 (0.89-2.18)   | p=0.145             |
|                        | Widowed            | 37 (3.6%)             | 320 (2.2%)   | 3.25 (2.52-4.18)    | p < 0.001 | 1.54 (1.11-2.12)   | <b>p=0.009</b>      |
| <b>Residence</b>       | Urban              | 502 (49.5%)           | 4939 (34.7%) | 1 (Reference)       |           | 1 (Reference)      |                     |
|                        | Rural              | 512 (50.5%)           | 9301 (65.3%) | 0.54 (0.48-0.62)    | p < 0.001 | 1.02 (0.86-1.20)   | p=0.853             |
| <b>Wealth status</b>   | Poorest            | 51 (5.0%)             | 2220 (15.6%) | 1 (Reference)       |           | -                  |                     |
|                        | Poorer             | 77 (7.6%)             | 2421 (17.0%) | 1.38 (0.97-1.98)    | p=0.075   | -                  | -                   |

|                                         |                 |              |               |                   |           |                  |                     |
|-----------------------------------------|-----------------|--------------|---------------|-------------------|-----------|------------------|---------------------|
|                                         | Middle          | 170 (16.8%)  | 2893 (20.3%)  | 2.56 (1.86-3.52)  | p < 0.001 | 2.28 (1.64-3.16) | <b>p &lt; 0.001</b> |
|                                         | Richer          | 241 (23.8%)  | 3137 (22.0%)  | 3.34 (2.46-4.55)  | p < 0.001 | 2.98 (2.14-4.15) | <b>p &lt; 0.001</b> |
|                                         | Richest         | 475 (46.8%)  | 3569 (25.1%)  | 5.79 (4.32-7.77)  | p < 0.001 | 5.06 (3.58-7.15) | <b>p &lt; 0.001</b> |
| <b>Smoke cigarette</b>                  | Yes             | 5 (0.5%)     | 64 (0.4%)     | 1.09 (0.44-2.73)  | p=0.841   | -                | -                   |
|                                         | No              | 1009 (99.5%) | 14176 (99.6%) | 1 (Reference)     |           | -                |                     |
| <b>Currently working</b>                | Yes             | 679 (67.0%)  | 8244 (57.9%)  | 1.47 (1.29-1.69)  | p < 0.001 | 0.88 (0.76-1.02) | p=0.098             |
|                                         | No              | 335 (33.0%)  | 5996 (42.1%)  | 1 (Reference)     |           | 1 (Reference)    |                     |
| <b>Covered by health insurance</b>      | Yes             | 98 (9.7%)    | 770 (5.4%)    | 1.87 (1.50-2.33)  | p < 0.001 | 0.91 (0.71-1.16) | p=0.437             |
|                                         | No              | 916 (90.3%)  | 13470 (94.6%) | 1 (Reference)     |           | 1 (Reference)    |                     |
| <b>Self-Reported Health Status</b>      | Very good       | 214 (21.1%)  | 2891 (20.3%)  | 1 (Reference)     |           | 1 (Reference)    |                     |
|                                         | Good            | 496 (48.9%)  | 7546 (53.0%)  | 0.89 (0.75-1.05)  | p=0.160   | -                | -                   |
|                                         | Moderate        | 278 (27.4%)  | 3678 (25.8%)  | 1.01 (0.85-1.23)  | p=0.825   | -                | -                   |
|                                         | Bad             | 25 (2.5%)    | 122 (0.9%)    | 2.77 (1.76-4.35)  | p < 0.001 | 2.87 (1.76-4.67) | <b>p &lt; 0.001</b> |
|                                         | Very bad        | 1 (0.1%)     | 3 (0.02%)     | 4.50 (0.47-43.48) | p=0.193   | -                | -                   |
| <b>Visited HF in the Last 12 months</b> | Yes             | 661 (65.2%)  | 7546 (53.0%)  | 1.66 (1.45-1.90)  | p < 0.001 | 1.38 (1.20-1.60) | <b>p &lt; 0.001</b> |
|                                         | No              | 353 (34.8%)  | 6694 (47.0%)  | 1 (Reference)     |           | 1 (Reference)    |                     |
| <b>Total Children Ever Born</b>         | No Child        | 121 (11.9%)  | 4017 (28.2%)  | 1 (Reference)     |           | 1 (Reference)    |                     |
|                                         | 1 to 3 Children | 434 (42.8%)  | 5866 (41.2%)  | 2.46 (2.00-3.02)  | p < 0.001 | 1.13 (0.84-1.54) | p=0.421             |
|                                         | >3 Children     | 459 (45.3%)  | 4357 (30.6%)  | 3.50 (2.85-4.29)  | p < 0.001 | 1.32 (0.93-1.88) | p=0.119             |

|                              |                 |             |              |                  |         |                  |                |
|------------------------------|-----------------|-------------|--------------|------------------|---------|------------------|----------------|
| <b>Birth in Last 5 Years</b> | No Birth        | 554 (54.6%) | 7019 (49.3%) | 1 (Reference)    |         | 1 (Reference)    |                |
|                              | Once or Twice   | 440 (43.4%) | 6884 (48.3%) | 0.81 (0.71-0.92) | p=0.001 | 0.80 (0.67-0.96) | <b>p=0.014</b> |
|                              | More than Twice | 20 (2.0%)   | 337 (2.4%)   | 0.75 (0.48-1.19) | p=0.224 | -                | -              |
